# 1 Preventing extinctions post-2020 2 requires recovery actions and 3 transformative change

4 Running head: Preventing extinctions post-2020

5

## 6 Authors

7 Friederike C. Bolam<sup>1,2\*</sup>, Jorge Ahumada<sup>3</sup>, H. Reşit Akçakaya<sup>4,5</sup>, Thomas M. Brooks<sup>6</sup>, Wendy Elliott<sup>7</sup>,  
8 Sean Hoban<sup>8</sup>, Louise Mair<sup>1</sup>, David Mallon<sup>5,9</sup>, Philip J.K. McGowan<sup>1</sup>, Domitilla Raimondo<sup>5,10</sup>, Jon Paul  
9 Rodríguez<sup>5,11,12</sup>, Dilys Roe<sup>13,14</sup>, , Mary B. Seddon<sup>15</sup>, Xiaoli Shen<sup>16</sup>, Simon N. Stuart<sup>5,17</sup>, James E.M.  
10 Watson<sup>18,19</sup>, Stuart H.M. Butchart<sup>20,21</sup>

11

## 12 Affiliations

13 1 School of Natural and Environmental Sciences, Newcastle University, NE1 7RU, Newcastle upon  
14 Tyne, UK.

15 2 UN Environment Programme, World Conservation Monitoring Centre (UNEP-WCMC), Cambridge,  
16 UK.

17 3 Moore Center for Science, Conservation International, Arlington, VA 22202, USA.

18 4 Department of Ecology and Evolution, Stony Brook University, Stony Brook, NY, 11794, USA.

19 5 IUCN Species Survival Commission, 28 rue Mauverney, CH-1196 Gland, Switzerland

20 6 IUCN, 28 rue Mauverney, CH-1196 Gland, Switzerland.

21 7 WWF International, c/o International Gorilla Conservation Programme, Kigali, Rwanda.

22 8 Center for Tree Science, The Morton Arboretum, 4100 Illinois Route 53, Lisle, USA.

23 9 Department of Natural Sciences, Manchester Metropolitan University, Manchester M1 5GD, UK.

24 10 Plant Conservation Committee, South African National Biodiversity Institute, Private Bag X101,  
25 Pretoria, 0001, South Africa.

26 11 Instituto Venezolano de Investigaciones Científicas, Caracas, Venezuela.

27 12 Provita, Caracas, Venezuela.

28 13 IUCN Sustainable Use and Livelihoods Specialist Group.

29 14 International Institute for Environment and Development (IIED); 80-86 Grays Inn Road, London  
30 WC1X 8NH, UK.

31 15 IUCN Species Survival Commission Mollusc Specialist Group, The Goods Shed, Klondyke Road,  
32 Okehampton, Devon, UK.

33 16 State Key Laboratory of Vegetation and Environmental Change, Institute of Botany, Chinese  
34 Academy of Sciences, 100093 Beijing, China.

35 17 Synchronicity Earth, 27-29 Cursitor Street, London, EC4A 1LT, UK.

36 18 School of Earth and Environmental Sciences, University of Queensland, St Lucia, Queensland,  
37 Australia.

38 19 Wildlife Conservation Society, Global Conservation Program, New York, USA.

39 20 BirdLife International, David Attenborough Building, Pembroke St, Cambridge CB2 3QZ, UK.

40 21 Department of Zoology, Downing Street, Cambridge CB2 3EJ, UK.

41 \* Correspondence to: [friederike.bolam@ncl.ac.uk](mailto:friederike.bolam@ncl.ac.uk)

42

43 **Word count: 2,485**

44

#### 45 **Key words**

46 Extinctions, IUCN Red List, conservation policy, Convention on Biological Diversity, Post-2020 Global  
47 Biodiversity Framework

48

#### 49 **Abstract**

50 Stopping human-induced extinctions will require strong policy commitments that comprehensively  
51 address threats to species. In 2021, a new Global Biodiversity Framework will be agreed by the  
52 Convention on Biological Diversity. Here we investigate how the suggested targets could contribute  
53 to reducing threats to threatened vertebrates, invertebrates, and plants, and assess the importance  
54 of a proposed target to implement recovery actions for threatened species. We find that whilst  
55 many of the targets benefit species, extinction risk for over one third of threatened species would  
56 not be reduced sufficiently without a target on recovery actions, including *ex situ* conservation,  
57 reintroductions and other species-specific interventions. A median of 41 threatened species per  
58 country require such actions, and they are found in most countries of the world. To prevent future  
59 extinctions, policy commitments must include recovery actions for the most threatened species in  
60 addition to broader transformative change.

#### 61 **Introduction**

62 The world is facing an extinction crisis, with over 32,000 species documented as threatened (IUCN  
63 2020), and extrapolations indicating that one million species are at risk of extinction (Díaz et al.,  
64 2019). Halting extinctions and reducing extinction risk is addressed in the UN Sustainable  
65 Development Goals, where Target 15.5 commits governments to “*by 2020, protect and prevent the*  
66 *extinction of threatened species*”. A key policy mechanism to reverse species loss is the Convention  
67 on Biological Diversity (CBD) to which 195 national governments are party.

68 In 2021, the Parties to the CBD will adopt a new Global Biodiversity Framework. The latest draft,  
69 published in August 2020, includes four goals and 20 targets to achieve the four goals (Secretariat of  
70 the CBD, 2020a). Goal A would commit countries to improving the status of natural ecosystems and  
71 “*reducing the number of species that are threatened by [X%]*” and maintaining genetic diversity by  
72 2050. Rounsevell et al. (2020) suggest that reducing extinction rates should be an overarching target  
73 for the CBD, analogous to the 2°C climate target, and emphasising the importance of saving species.

74 The CBD's previous target to prevent extinctions and improve the status of threatened species by  
75 2020 was not achieved (Secretariat of the CBD, 2020b). While some extinctions were prevented  
76 (Bolam et al. 2020), other species were lost, including Pinta Giant Tortoise *Chelonoidis abingdonii*  
77 and Alagoas Foliage-gleaner *Philydor novaesi* (IUCN 2020). A total of 23.7% of species remain listed  
78 as threatened with extinction of those taxonomic groups that have been comprehensively assessed  
79 on the IUCN Red List (Secretariat of the CBD, 2020b). On average, vertebrate populations are  
80 estimated to have declined (Inger et al. 2014, WWF 2020.)

81 The post-2020 Global Biodiversity Framework will set the global conservation agenda for the next  
82 decade. To learn from the past and avoid future human-induced extinctions, it is important to  
83 evaluate whether the proposed targets will be adequate for halting the extinction of threatened  
84 species. We assess how individual targets potentially contribute to reducing threats to species. We  
85 identify how many species would benefit from targets that address major drivers of species loss. We  
86 also identify those species that will remain threatened without a target on species-specific recovery  
87 actions, because the threats to their survival are not addressed by the other targets or because  
88 species-specific recovery actions have been identified as critical for their survival.

## 89 Methods

90 We considered seven of the 20 proposed targets (Secretariat of the CBD, 2020a) - those that address  
91 threats to biodiversity and active species management. The seven targets aim to (1) implement  
92 spatial planning to retain and restore ecosystems and connectivity, (2) protect and conserve sites of  
93 particular importance for biodiversity, (3) ensure active management to enable species recovery,  
94 and reduce human-wildlife conflict, (4) ensure harvesting, trade, and use of species is legal and  
95 sustainable, (5) address invasive species, (6) reduce pollution, and (7) contribute to climate change  
96 mitigation and adaptation. To identify the number of threatened or Extinct in the Wild species that  
97 would benefit from each of the proposed targets, we matched threats to species with those that we  
98 judged would be addressed by each target. We treated Target 3 differently as it is not about a  
99 particular threat, but to encourage active species management.

## 100 Taxonomic groups included

101 We downloaded IUCN Red List of Threatened Species (IUCN 2020, hereafter Red List) information for  
102 all comprehensively assessed taxonomic groups at a global level (36,602 species) on 12 May 2020,  
103 and retained all species listed as threatened (i.e. in the Red List categories of Critically Endangered,  
104 Endangered or Vulnerable) or Extinct in the Wild (7,313 species): amphibians (2,204 species), birds  
105 (1,491), mammals (1,248), selected dicot groups (683), selected crustacean groups (482), reef-  
106 forming corals (232), sharks, rays and chimeras (206), conifers (205), selected bony fishes groups  
107 (202), cycads (196), selected reptile groups (100), selected gastropod groups (41), hagfish (9),  
108 cephalopods (5), gnetopsida (4), coelacanth and lungfish (3), and horseshoe crabs (2).

## 109 Matching threats to targets

110 Pressures on species are documented on the Red List using hierarchical classification schemes for  
111 threats and stresses (Salafsky et al., 2008). The threats are grouped into 12 broad categories,  
112 including biological resource use, pollution, and climate change and severe weather. Each record of  
113 a threat to a species also has corresponding stresses listed (i.e. how the threat is affecting the  
114 species, for example through ecosystem degradation or species mortality). Of species we  
115 considered, 98% have at least one threat listed in their assessments. The threats have corresponding  
116 stresses listed for 97% of species-threat records.

117 We matched each threat-stress combination to the proposed targets (see supplementary material)  
118 because different stresses resulting from each threat may be addressed by different targets. We  
119 excluded natural threats such as volcanoes and earthquakes, which cannot be easily mitigated and  
120 are documented as threatening only 141 species. We grouped Target 1 (Spatial planning to retain  
121 and restore ecosystems) and Target 2 (Protect sites for particular importance for biodiversity) as  
122 their impacts on threats and stresses to species cannot be disentangled. We then calculated the  
123 number of species affected by each threat-stress combination. Because documentation of stresses  
124 and conservation actions needed on the Red List may not be comprehensive, it is possible that the  
125 findings presented here underestimate the number of species that would benefit from achievement  
126 of each target.

### 127 Identifying species needing recovery actions

128 To identify species that would benefit from the proposed Target 3 (Ensure active management to  
129 enable species recovery), we first identified species that are affected by threats not addressed by  
130 any of the other targets. We then added those species that require species-specific conservation  
131 actions as listed on the Red List (species recovery, species reintroduction, and *ex situ* conservation).  
132 This information was available for 84% of the threatened species we analysed. Using data from the  
133 Red List, we mapped the distribution at country-level for species that require Target 3.

134 We also identified species with very small population sizes, making them highly susceptible to  
135 inbreeding depression, allee effects (inability to find mates), lack of genetic variation for adaptation,  
136 and stochastic events. Such species may not fully recover without the measures proposed in Target  
137 3. Specifically, we identified species with a minimum population size below 1,000 mature individuals,  
138 those assessed under Red List criterion D or D1, those assessed as Critically Endangered under  
139 criterion C, or Endangered or Vulnerable under criterion C2ai. These criteria are triggered if the  
140 number of mature individuals, or the number in each subpopulation, is below 1,000. We also  
141 included species with severely fragmented ranges and extreme fluctuations (criterion Bac).

## 142 Results

143 There are substantial differences in the number of species that would benefit from each target,  
144 according to the threats coded for each species (Fig. 1A). Target 1 (Using spatial planning to retain  
145 and restore ecosystems) and Target 2 (Protect and conserve sites for particular importance for  
146 biodiversity) combined will be particularly important as 83% of threatened and Extinct in the Wild  
147 species (6,058 species) would benefit from their implementation. This is followed by Target 4  
148 (Ensure harvesting, trade and use of wild species is legal and at sustainable levels) with 63% (4,596  
149 species), Target 5 (Address invasive species) with 23% (1,695 species), Target 6 (Reduce pollution)  
150 with 20% (1,472 species) and Target 7 (Climate change mitigation and adaptation) with 18% (1,339  
151 species).

152 At least 37% of threatened and Extinct in the Wild species (2,707 species) would likely require Target  
153 3 (Ensure active management to enable species recovery) (Fig. 1A). These comprise 1,977 species  
154 that are affected by threats not addressed in the proposed targets, and 1,521 species that need  
155 species recovery actions, *ex situ* conservation, and/or reintroductions (with an overlap of 791  
156 species). Species potentially requiring Target 3 occur in almost every country of the world, with a  
157 median of 41 species per country (fig. 1B). Australia supports most species (356), followed by  
158 Indonesia (334) and Malaysia (278). Additionally, a further 489 species have population sizes below  
159 1,000 and may also benefit from Target 3.

160 Some actions necessary for conserving threatened species according to the Red List are addressed  
161 by the proposed post-2020 action targets that focus on mitigating threats, such as site and area  
162 protection and management, necessary for 5,053 species (Fig. 2). Most of such actions would  
163 however only be covered under Target 3, such as *ex situ* conservation (listed for 1,142 species),  
164 species recovery actions including vaccinations, supplementary feeding, or breeding site provision  
165 (681 species), and species re-introductions (260 species).

## 166 Discussion

167 Our analysis provides an indication of the relative importance of different targets for achieving the  
168 goal for conserving threatened species. Maintaining ecosystems and protected areas will play a key  
169 role, since 83% of threatened and Extinct in the Wild species could benefit from them. Other key  
170 actions include managing unsustainable harvesting and trade (addressed by Target 4, 63% of  
171 species), and controlling invasive species (Target 5, 23% of species). However, Target 3 will be  
172 essential in promoting the recovery of over one in three threatened and Extinct in the Wild species,  
173 because their threats are not addressed by the other targets, or because they require targeted  
174 species-specific actions. Our results emphasise how critical it is to retain such a target in further  
175 negotiations.

### 176 Tackling the most pervasive threats

177 The CBD's post-2020 Global Biodiversity Framework needs to lead to the transformative change  
178 required for halting species extinctions (Díaz et al., 2020), by addressing the underlying drivers of  
179 species loss. Tackling threats is important for currently threatened species, but also for preventing  
180 even more species from becoming threatened. Our results highlight the importance of targets that  
181 aim to tackle the most pervasive threats to species, particularly land use change through agriculture  
182 and overexploitation. There are transformative pathways that show we can maintain ecosystems  
183 whilst ensuring food security, by making food production more sustainable, changing consumption  
184 and diet choices to sustainable and healthy levels, and increasing protected area coverage (Leclère  
185 et al., 2020), all of which are consistent with the draft targets.

186 To ensure the proposed targets will lead to halting extinctions however, two further assumptions  
187 must be met: that targets address threats sufficiently to reduce extinction risk, and that targets are  
188 fully and effectively implemented (Díaz et al., 2020). For example, threatened species need adequate  
189 representation in the network of protected areas and other effective area-based conservation  
190 measures, by securing sites such as KBAs that are critical in their conservation value (Visconti et al.,  
191 2019). Such species not only need sufficient coverage by protected and conserved areas, but also  
192 that these are effectively and equitably managed and appropriately connected (Maxwell et al.,  
193 2020). While effective management and connectivity are part of the draft Target 2 wording,  
194 equitable management is not, even though it is known to lead to better outcomes for both people  
195 and nature (Oldekop et al., 2016), and is in line with some of the other draft targets.

### 196 Species that require recovery actions to ensure their survival

197 Our analysis has demonstrated that in order to achieve Goal A, it is essential to retain Target 3 in the  
198 Post-2020 Global Biodiversity Framework, to ensure active management to enable species recovery.  
199 Target 3 will be necessary for 2,707 species that are facing threats not tackled by other targets, or  
200 that will require species-specific recovery actions. Examples include 238 endemic Hawaiian plant  
201 species with fewer than 50 individuals remaining in the wild (Werden et al., 2020), such as the  
202 Punaluu Haha *Cyanea truncata* which requires intensive *in situ* recovery actions to manage the  
203 threat of invasive species as well as *ex situ* conservation to supplement the population. For other  
204 plant species, labour-intensive planting, watering and protection of seedlings is needed due to no

205 natural regeneration, such as the iconic oak *Quercus brandegeei* in Mexico (Denvir et al., 2016), and  
206 the Baishan Fir *Abies beshanzuensis* in China (Yang et al., 2013). The Lord Howe Island Stick-insect  
207 *Dryococelus australis* has no more than 35 surviving individuals in the wild, but once invasive plants  
208 are removed from its range on a small island, re-introduction efforts will take place using individuals  
209 from *ex situ* populations in zoos that number in the thousands (Rudolph and Brock, 2017).

210 For other species, we do not yet fully understand how to tackle the threats they face, such as 232  
211 threatened coral species impacted by bleaching, 571 threatened amphibian species impacted by  
212 chytridimycosis, or those species whose mutualists (seed dispersers, pollinators, symbionts) have  
213 disappeared locally or globally. For such species, *ex situ* conservation may ‘buy time’ while feasible  
214 interventions are devised, tested, and applied (da Silva et al., 2019). This would ensure that species  
215 can be re-introduced, or populations supplemented.

216 There is evidence that we can prevent extinctions even of those species at the brink of extinction  
217 (Bolam et al., 2020). For a subset of threatened species, these actions are not only necessary but  
218 also achievable if there is political will and resources available to reverse declines. There are  
219 examples of species that have recovered rapidly owing to recovery actions, such as the Seychelles  
220 Warbler *Acrocephalus sechellensis* which was listed as threatened in 1988 and had recovered to  
221 Near Threatened by 2015 due to translocations and habitat management (BirdLife International,  
222 2016). To prevent further extinctions, these actions need to be underpinned by strong policy  
223 commitments so they can be scaled up.

## 224 A target for species recovery actions post-2020

225 Our results demonstrate the importance of retaining Target 3 in future negotiations to prevent  
226 further extinctions. The current wording, “By 2030, ensure active management actions to enable  
227 wild species of fauna and flora recovery and conservation, and reduce human-wildlife conflict by  
228 [X%]”, would benefit from greater detail, for example, “Implement intensive species-specific recovery  
229 actions by 2030, in situ and ex situ, where required, for species whose survival depends on such  
230 actions or whose recovery cannot otherwise be enabled or sustained.” We also suggest that the need  
231 to address human-wildlife conflict would be more appropriately included in draft Target 4 on  
232 harvesting, trade and use of species, rather than in Target 3.

233 If sufficiently implemented, our proposed target wording would contribute to achieving the 2050  
234 draft goal of reducing the number of species that are threatened. Target 3 could be monitored using  
235 indicators based on the IUCN Red List, including the Red List Index (measuring trends in extinction  
236 risk for sets of species, Butchart et al., 2004, Butchart et al., 2007). It could be informed by the  
237 establishment of science-based targets for species using the Species Threat Abatement and  
238 Restoration metric (Mair et al. in review) and by Green Status of Species assessments (Akçakaya et  
239 al., 2018).

240 The draft targets of the post-2020 Global Biodiversity Framework cover the key threats to species. In  
241 addition, Target 3 covers the interventions required for those species in need of additional recovery  
242 actions. Therefore it is critical that all draft targets are retained in the final framework. Further  
243 human-induced species extinctions can be prevented, but only if both threats to species are  
244 addressed and species recovery actions are implemented as a matter of urgency.

## 245 References

246 Akçakaya HR, Bennett EL, Brooks TM, et al. 2018. Quantifying species recovery and conservation  
247 success to develop an IUCN Green List of Species. *Conservation Biology*, 32: 1128-1138.

- 248 BirdLife International. 2016. *Acrocephalus sechellensis*. [https://dx.doi.org/10.2305/IUCN.UK.2016-](https://dx.doi.org/10.2305/IUCN.UK.2016-3.RLTS.T22714882A94431883.en)  
249 [3.RLTS.T22714882A94431883.en](https://dx.doi.org/10.2305/IUCN.UK.2016-3.RLTS.T22714882A94431883.en). Viewed on 05 October 2020.
- 250 Bolam FC, Mair L, Angelico M, *et al.* 2020. How many bird and mammal extinctions has recent  
251 conservation action prevented? *Conservation Letters*.
- 252 Butchart SH, Stattersfield AJ, Bennun LA, *et al.* 2004. Measuring global trends in the status of  
253 biodiversity: Red List Indices for birds. *PLoS Biol*, 2: e383.
- 254 Butchart SH, Akçakaya HR, Chanson J, *et al.* 2007. Improvements to the red list index. *PLoS one*, 2:  
255 e140.
- 256 da Silva R, Pearce-Kelly P, Zimmerman B, *et al.* 2019. Assessing the conservation potential of fish and  
257 corals in aquariums globally. *Journal for Nature Conservation*, 48: 1-11.
- 258 Díaz S, Settele J, Brondízio ES, *et al.* 2019. Pervasive human-driven decline of life on Earth points to  
259 the need for transformative change. *Science*, 366.
- 260 Díaz S, Zafra-Calvo N, Purvis A, *et al.* 2020. Set ambitious goals for biodiversity and sustainability.  
261 *Science*, 370, 411-413.
- 262 Denvir A, Westwood M. 2016. *Quercus brandegeei*. [https://dx.doi.org/10.2305/IUCN.UK.2016-](https://dx.doi.org/10.2305/IUCN.UK.2016-3.RLTS.T30726A2795363.en)  
263 [3.RLTS.T30726A2795363.en](https://dx.doi.org/10.2305/IUCN.UK.2016-3.RLTS.T30726A2795363.en). Viewed on 06 November 2020.
- 264 Inger R, Gregory R, Duffy JP, *et al.* 2015. Common European birds are declining rapidly while less  
265 abundant species' numbers are rising. *Ecology letters*, 18, 28-36.
- 266 IUCN. 2020. The IUCN Red List of Threatened Species. Version 2019-3. <https://www.iucnredlist.org>.  
267 Viewed on 12 May 2020.
- 268 Leclère D, Obersteiner M, Barrett M, *et al.* 2020. Bending the curve of terrestrial biodiversity needs  
269 an integrated strategy. *Nature*, 585: 551-556.
- 270 Mair L, Bennun LA, Brooks TM, *et al.* Measuring spatially-explicit contributions to science-based  
271 species targets. (In review)
- 272 Maxwell SL, Cazalis V, Dudley, *et al.* 2020. Area-based conservation in the twenty-first century.  
273 *Nature*, 586: 217-227.
- 274 Oldekop JA, Holmes G, Harris WE, Evans KL. 2016. A global assessment of the social and conservation  
275 outcomes of protected areas. *Conservation Biology*, 30: 133-141.
- 276 Rounsevell MDA, Harfoot M, Harrison PA, *et al.* 2020. A biodiversity target based on species  
277 extinctions. *Science*, 368: 1193-1195.
- 278 Rudolf E, Brock P. 2017. *Dryococelus australis*. [https://dx.doi.org/10.2305/IUCN.UK.2017-](https://dx.doi.org/10.2305/IUCN.UK.2017-3.RLTS.T6852A21426226.en)  
279 [3.RLTS.T6852A21426226.en](https://dx.doi.org/10.2305/IUCN.UK.2017-3.RLTS.T6852A21426226.en). Viewed on 06 November 2020.
- 280 Secretariat of the CBD, CBD/POST2020/PREP/2/1. 2020a. Available at  
281 <https://www.cbd.int/doc/c/3064/749a/0f65ac7f9def86707f4eaefa/post2020-prep-02-01-en.pdf>.  
282 Viewed on 06 November 2020.
- 283 Secretariat of the CBD. 2020b. Global Biodiversity Outlook 5. Montreal. Available at  
284 <https://www.cbd.int/gbo/gbo5/publication/gbo-5-en.pdf>. Viewed on 06 November 2020.

- 285 Salafsky, N, Salzer D, Stattersfield AJ, *et al.* 2008. A standard lexicon for biodiversity conservation:  
286 unified classifications of threats and actions. *Conservation Biology*, 22: 897-911.
- 287 Visconti, P, Butchart, SHM, Brooks TM, *et al.* 2019. Protected area targets post-2020. *Science*, 364:  
288 239-241.
- 289 Werden LK, Sugii NC, Weisenberger L, *et al.* 2020. Ex situ conservation of threatened plant species in  
290 island biodiversity hotspots: A case study from Hawai 'i. *Biological Conservation*, 243, 108435.
- 291 WWF. 2020. Living Planet Report 2020 - Bending the curve of biodiversity loss. Almond, R.E.A.,  
292 Grooten M. and Petersen, T. (Eds). WWF, Gland, Switzerland.
- 293 Yang Y, Zhang D, Luscombe D, *et al.* 2013. *Abies beshanzuensis*.  
294 <https://dx.doi.org/10.2305/IUCN.UK.2013-1.RLTS.T32318A2814360.en>. Viewed on 06 November  
295 2020.

296

297

298 **Acknowledgments:** We thank Craig Hilton-Taylor for provision of data and Bob Lacy for comments  
299 on an early draft.

300

301 **Funding:** FCB and LM are funded by Newcastle University, UK.

302

303 **Author contributions:** Conceptualization: FCB, TMB, LM, PJKM, SNS, JEMW, SHMB; Methodology:  
304 FCB, HRA, TMB, LM, SHMB; Formal analysis: FCB; Data curation: FCB; Writing - original draft: FCB,  
305 TMB, SHMB; Writing - reviews & editing: FCB, JA, HRA, TMB, WE, SH, LM, DM, PJKM, DRa, JPR, DRo,  
306 MBS, XS, SNS, JEMW, SHMB; Visualization: FCB; Supervision: PJKM, SHMB; Project administration:  
307 FCB, PJKM.

308

309 **Competing interests:** N/A.

310

311 **Data and materials availability:** Data and code for reproducing numbers and figures shown are  
312 available at [https://github.com/rbolam/Species\\_target](https://github.com/rbolam/Species_target).

313



## 314 Figure captions

315 Figure 1.A. Number of threatened and Extinct in the Wild species whose threats are addressed by  
316 the proposed post-2020 targets for all comprehensively assessed species groups on the IUCN Red  
317 List. Species (N = 7,313) can be affected by more than one threat, and threats can be tackled by  
318 more than one target. Colours distinguish different threats. Threats are based on the IUCN Red List  
319 classification, except for *additional actions required* (see methods). B. Number of species per country  
320 that require implementation of Target 3.

321 Figure 2. Number of threatened species that need different types of conservation actions, as  
322 identified through the IUCN Red List (IUCN 2020), by IUCN Red List category. The 15 species listed as  
323 Extinct in the Wild were excluded as there are too few to visualise in this figure.

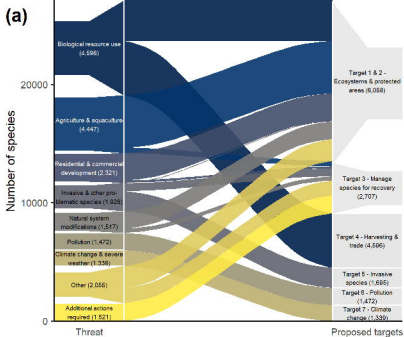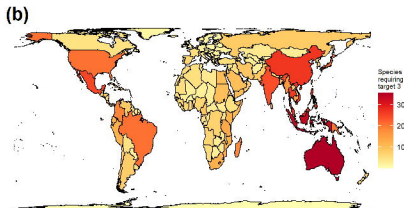

Recovery actions needed

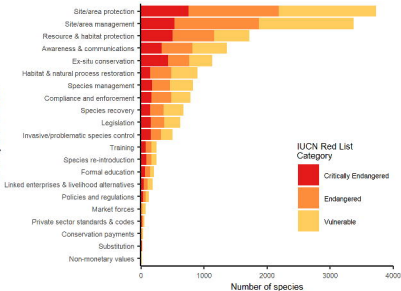

Source: https://biorxiv.org/content/10.1101/2020.11.09.374314v1.full.pdf
